# Supplementary material for: A new estimation of the total flavonoids in silkworm cocoon sericin layer through aglycone determination by hydrolysis-assisted extraction and HPLC-DAD analysis
Source: PubMed Central journal article supplement (PMC4793258; doi:10.3402/fnr.v60.30932), 2016-03-14
Supplement: FNR-60-30932-s001.pdf [file FNR-60-30932-s001.pdf]

Supplementary Figure 1

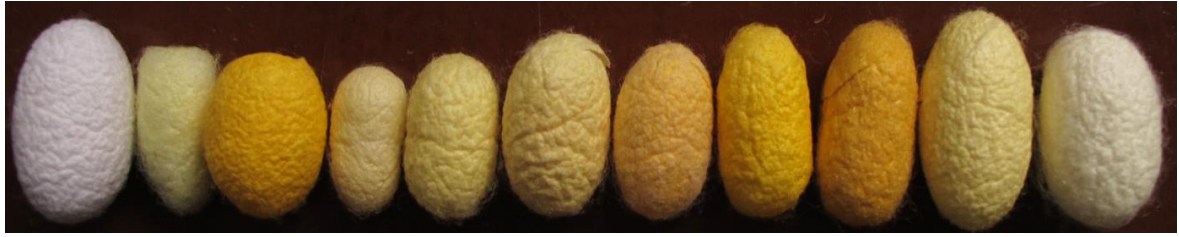

|        |        |                 |       |       |       |       |       |       |       |       |
|--------|--------|-----------------|-------|-------|-------|-------|-------|-------|-------|-------|
| White  | Daizo  | 1201            | 1-342 | 1-425 | 1-427 | 1-451 | 1-474 | 1-901 | 1-949 | 4-524 |
| cocoon | cocoon | Colored cocoons |       |       |       |       |       |       |       |       |
